# Supplementary material for: A solvent replenishment solution for managing evaporation of biochemical reactions in air-matrix digital microfluidics devices
Source: Royal Society of Chemistry journal article supplement (doi:10.1039/c4lc00703d), 2014-10-01
Supplement: c4lc00703d1.pdf [file c4lc00703d1.pdf]

**Figure S1.**

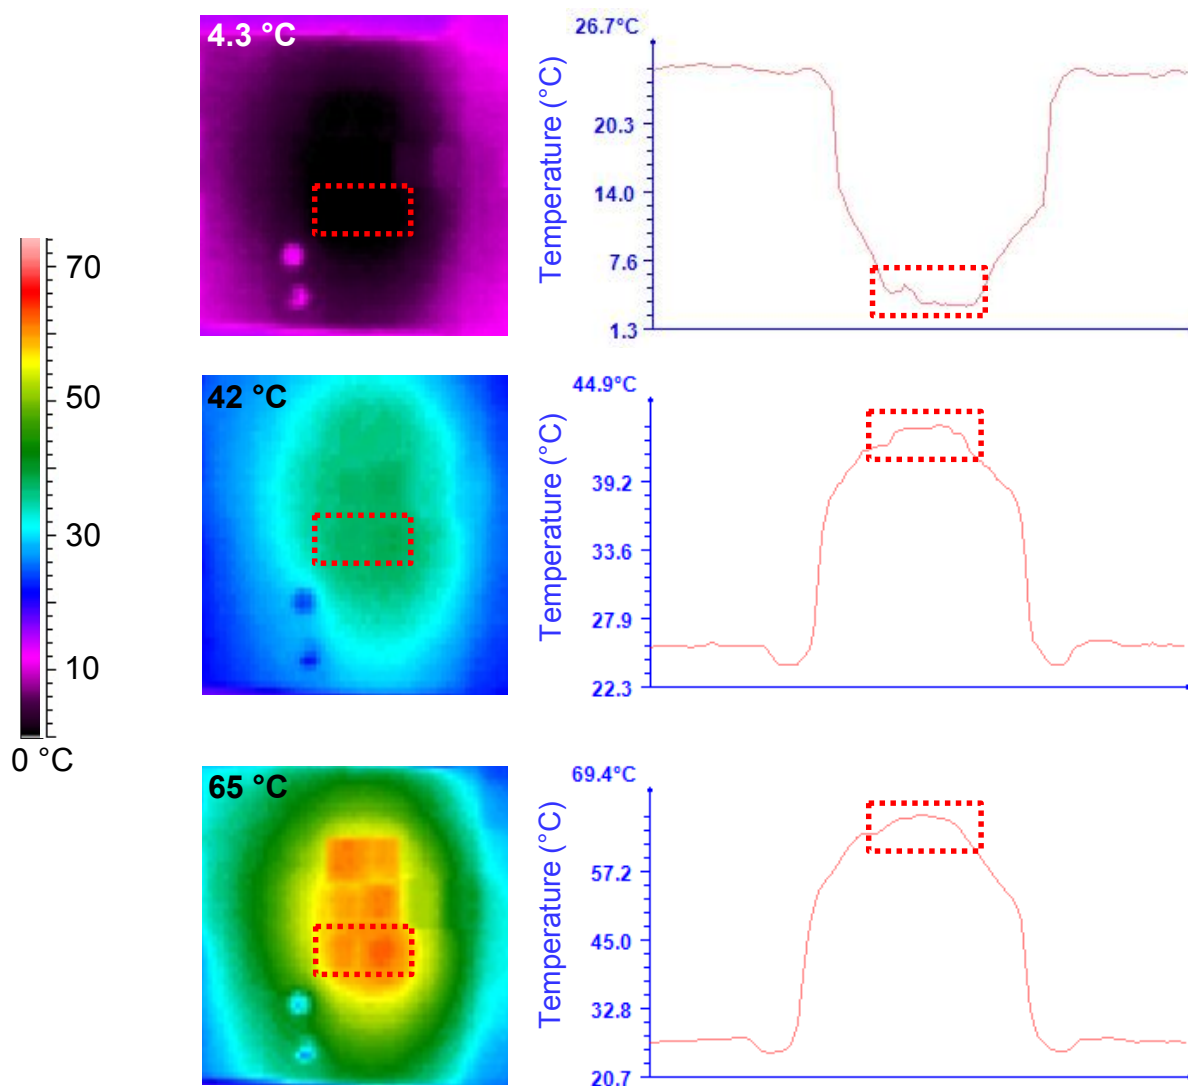

**Figure S1.** Thermal images (left) and temperature profile (right) of an on-chip thermal zone set at three different temperatures. Each thermal zone spans six actuation electrodes; temperature measurements were collected by lateral sweep across the bottom row of electrodes (periphery demarcated by red dotted lines).

**Figure S2.**

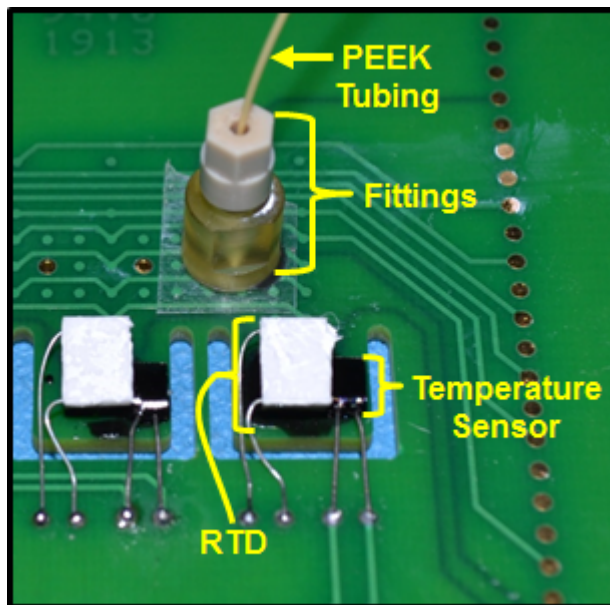

**Figure S2.** A back-side view of the air-matrix DMF device, highlighting its integrated thermoelectric modules, resistive temperature detectors (RTD), and a microcapillary interface for introduction of replenishing droplets onto the DMF surface *via* a drilled through hole.

**Figure S3.**

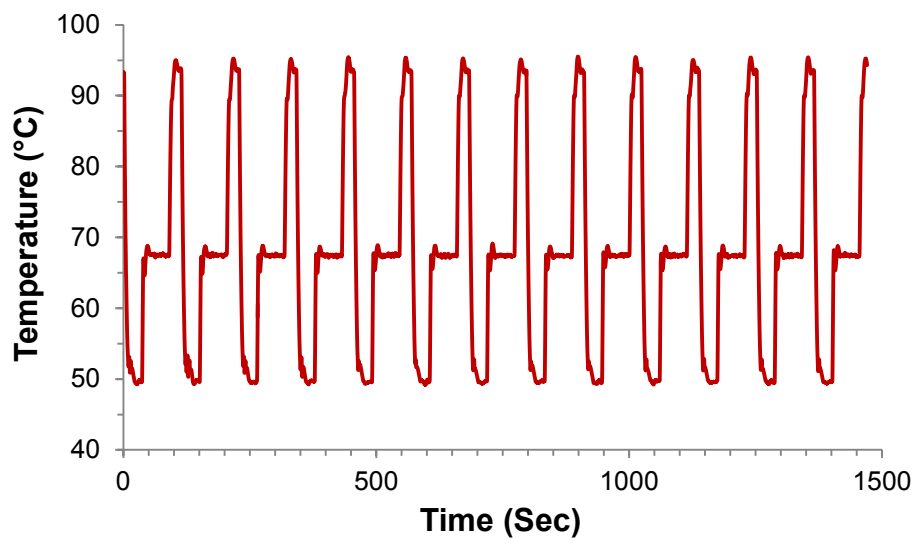

**Figure S3.** Temperature cycling trace of thermal zone over time.

**Table S1.**

| <b>Target Temperature (°C)</b> | <b>Temperature (°C) Decrease of Reaction Droplet After Replenishment (Average ± Standard Deviation)</b> |
|--------------------------------|---------------------------------------------------------------------------------------------------------|
| 35                             | $0.7 \pm 0.15$                                                                                          |
| 55                             | $0.5 \pm 0.11$                                                                                          |
| 75                             | $0.4 \pm 0.08$                                                                                          |
| 95                             | $0.2 \pm 0.19$                                                                                          |
